# Supplementary figures and images for: Bibliographic review on the state of the art of strontium and zinc based regenerative therapies. Recent developments and clinical applications
Source: Royal Society of Chemistry journal article supplement (doi:10.1039/c8tb02738b), 2019-01-01

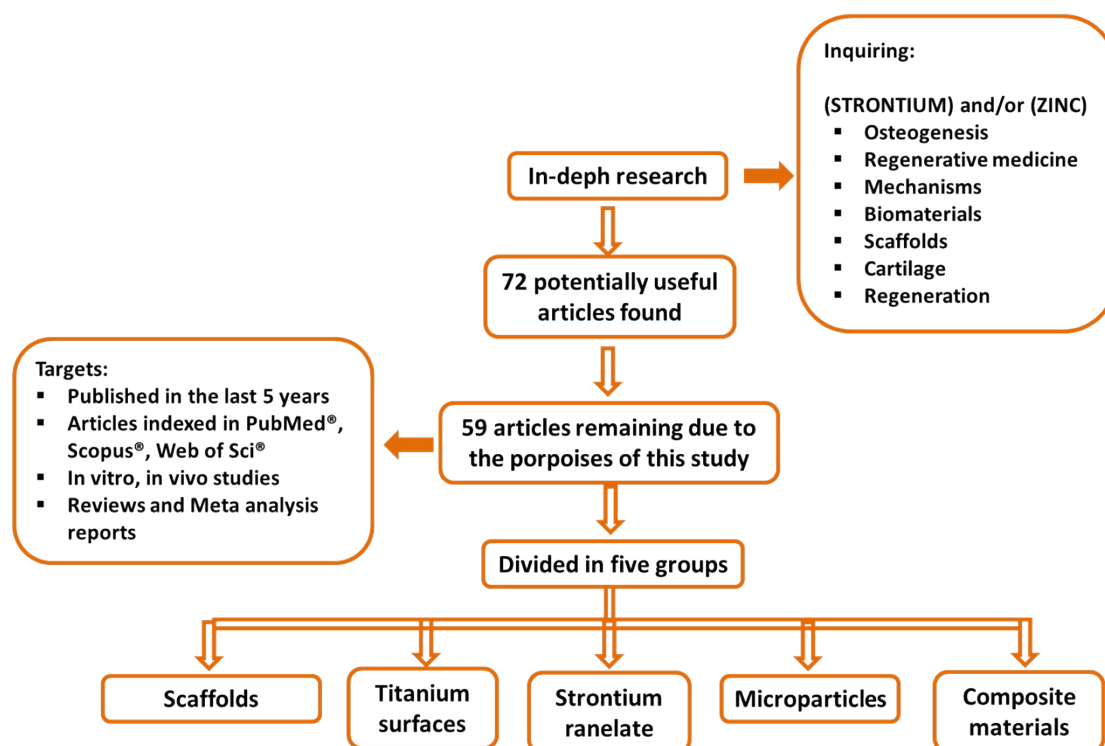

Supporting Figure 1. Flow diagram showing the screening process carried out in this review

Supplement: c8tb02738b1.pdf [file c8tb02738b1.pdf]
